# Supplementary material
Source: MDPI journal article supplement (https://www.mdpi.com/1424-2818/12/1/21)
Supplement: s1 [file s1]

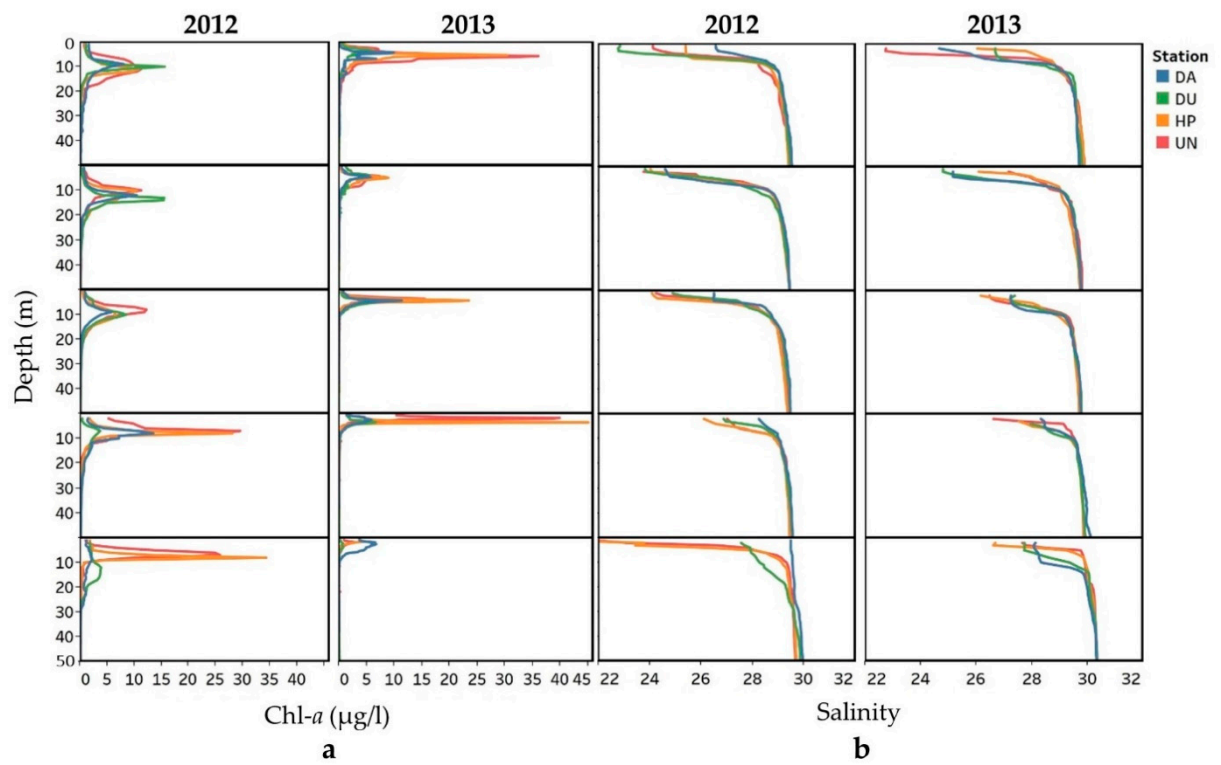

**Figure S1.** Upper 50-m profiles of **(a)** chlorophyll and **(b)** salinity in June through October of 2012 and 2013 from CTD casts conducted at the four sampling sites in Hood Canal.

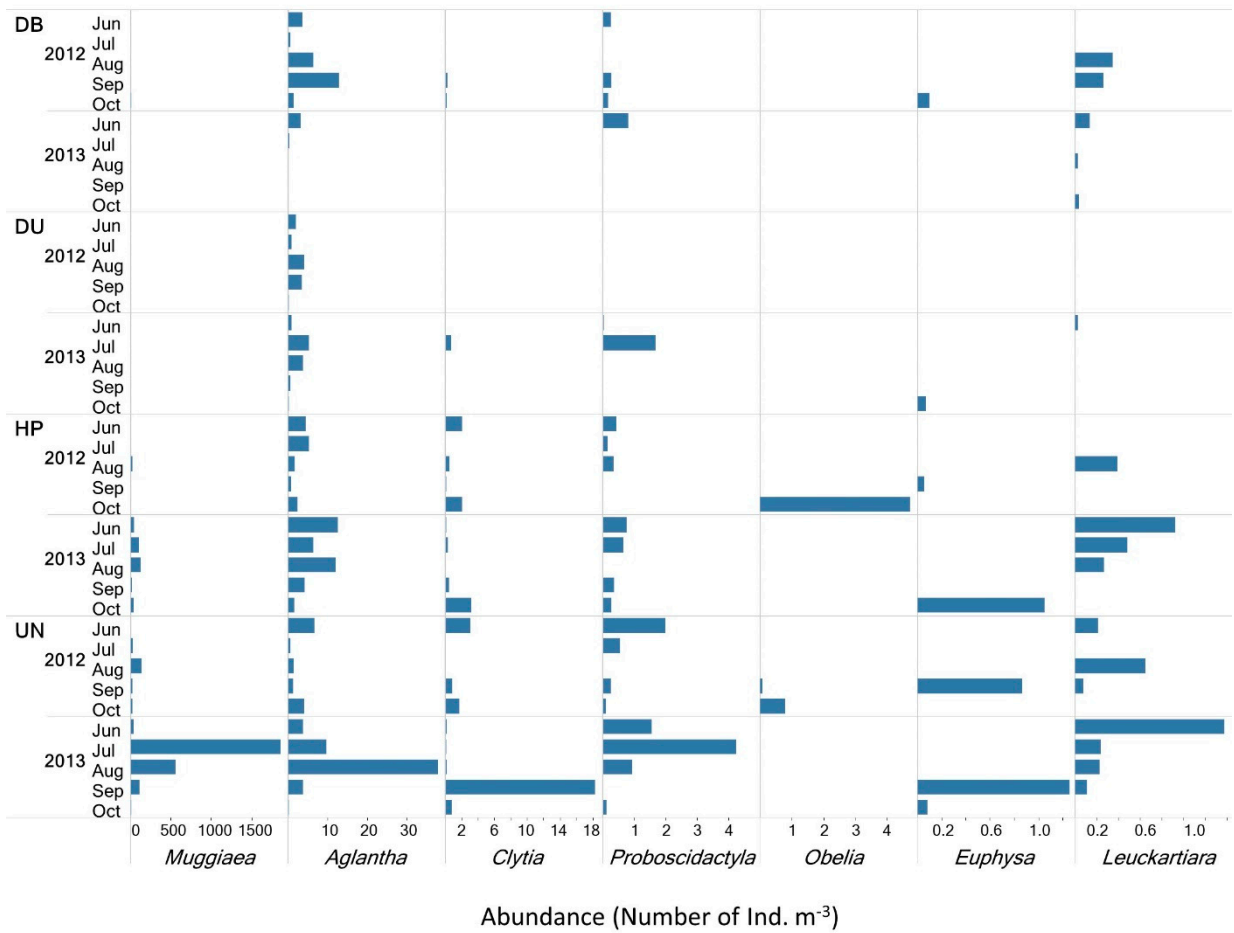

**Figure S2.** Abundances (number of individuals m<sup>-3</sup>) of dominant gelatinous zooplankton taxa at each station by month and year. Full species names where known are given in the text. See Figure 1 for station abbreviations.
